# Supplementary material
Source: PubMed Central journal article supplement (PMC3005135)
Supplement: NIHMS246374-supplement-supplemental_figures.pdf [file NIHMS246374-supplement-supplemental_figures.pdf]

# Supplement Material

## Supplemental Figure Legends

**Supplemental Figure I:** In vivo quantification of blood pool activity measured in regions of interest drawn over the heart on RP805 microSPECT/CT images obtained at 2 weeks after surgery.

**Supplemental Figure II:** Examples of F4/80 and control antibody immunofluorescent staining (in red) of remodeling carotid arteries. Elastic membrane autofluorescence is in green and nuclei are stained with DAPI in blue. Scale bar: 10  $\mu\text{m}$ .

**Supplemental Figure III: A,** Representative examples of MMP immunofluorescent staining (in red) of sham-operated right, and injured left common carotid arteries at 4 weeks after surgery in the withdrawal group. Elastic membrane autofluorescence is in green and nuclei are stained with DAPI in blue. The insets represent staining with control antibodies. Scale bar: 50  $\mu\text{m}$ . **B,** Examples of in situ gelatinase activity (in green) of sham-operated right, and injured left common carotid arteries at 4 weeks after surgery in the withdrawal group. Scale bar: 100  $\mu\text{m}$ .

# Supplemental Figure I

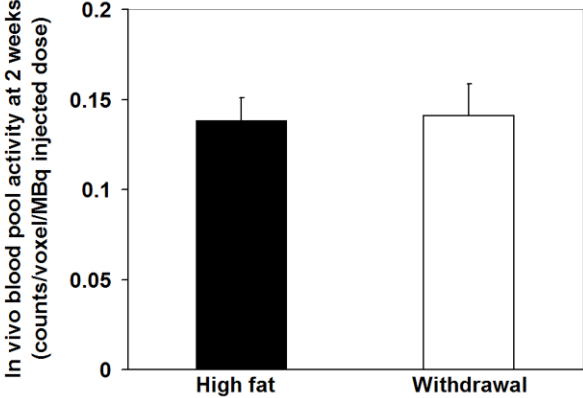

**Supplemental Figure II**

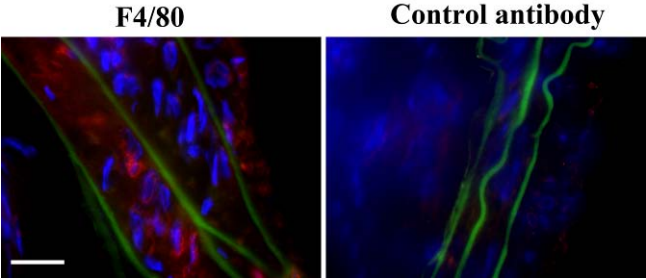

Supplemental Figure IIIA

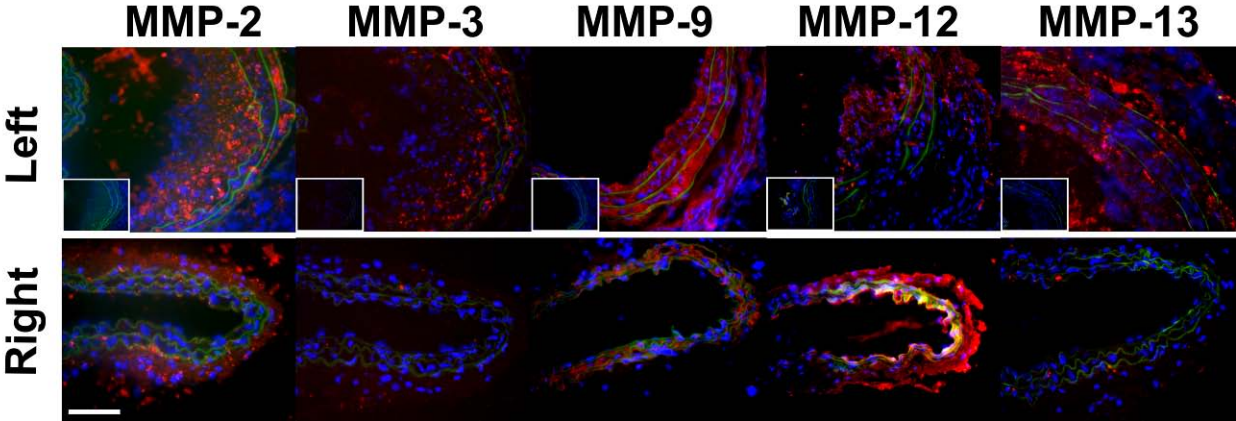

Supplemental Figure IIIB

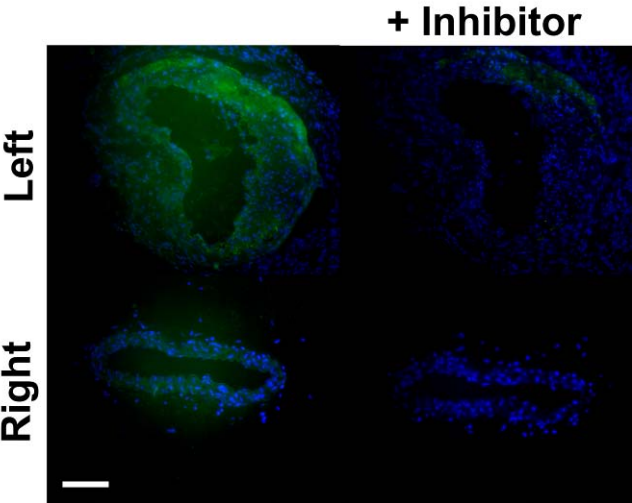

## Supplemental Table

### Correlation between the macrophage markers, CD68 and EMR1, and MMP mRNA expression in carotid arteries at 4 weeks after surgery

| MMPs   | CD68  |         | EMR1  |         |
|--------|-------|---------|-------|---------|
|        | R     | P       | R     | P       |
| MMP-2  | 0.71  | < 0.001 | 0.90  | < 0.001 |
| MMP-3  | 0.76  | < 0.001 | 0.69  | < 0.001 |
| MMP-9  | -0.14 | NS      | -0.16 | NS      |
| MMP-12 | 0.66  | < 0.001 | 0.74  | < 0.001 |
| MMP-13 | 0.74  | < 0.001 | 0.55  | < 0.01  |

MMP: matrix metalloproteinase; NS: not significant
